# Supplementary material
Source: Springer Nature journal article supplement (https://www.springermedizin.de/resource/supplementary/12955_2014_1303_MOESM1_ESM.pdf/9559496)
Supplement: MOESM1 [file 9559496]

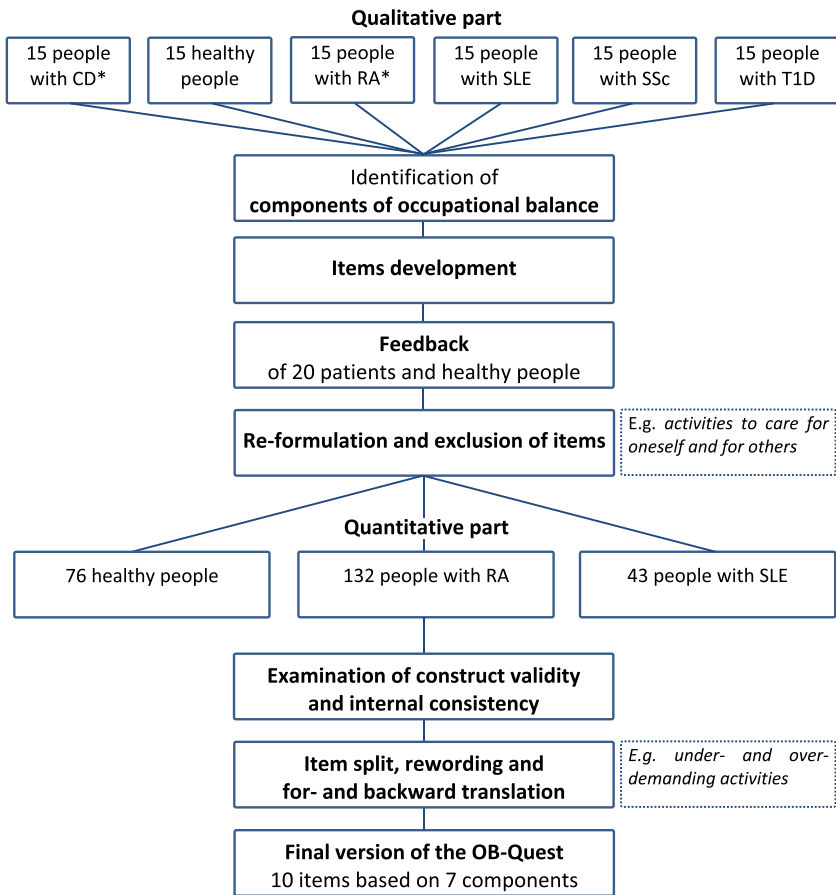

Abbreviations: CD = Crohn's disease, RA = rheumatoid arthritis, SLE= systemic lupus erythematosus, SSc = systemic sclerosis, T1D = diabetes mellitus type one, \* = secondary analyses of qualitative data, OB-Quest = Occupational Balance-Questionnaire
